# Supplementary material for: A Systematic Study of Anti-Osteosarcoma Mechanism of pH-Sensitive Charge-Conversion Cinnamaldehyde Polymeric Prodrug Micelles In Vitro
Source: MDPI journal article supplement (doi:10.3390/biomedicines11061524), 2023-05-25
Supplement: s1 [file s1]

Supplementary Material

# A systematic study of anti-osteosarcoma mechanism of pH-sensitive charge-conversion cinnamaldehyde polymeric prodrug micelles *in vitro*

Jiapeng Deng,<sup>†,1,2</sup> Qichang Wang,<sup>†,1,2</sup> Huihui Xu,<sup>1,2</sup> Guoqing Li,<sup>1,2</sup> Su Liu,<sup>1,2</sup> Yixiao Chen,<sup>1,2</sup> Fei Yu,<sup>1,2</sup> Weiqiang Yan,<sup>3</sup> Hui Zeng,<sup>\*,1,2</sup> Peng Liu<sup>\*,1,2</sup>

<sup>1</sup> National & Local Joint Engineering Research Center of Orthopaedic Biomaterials, Peking University Shenzhen Hospital, Shenzhen, PR China, 518036.

<sup>2</sup> Department of Bone & Joint Surgery, Peking University Shenzhen Hospital, Shenzhen, PR China, 518036.

<sup>3</sup> Department of Radiology, Peking University Shenzhen Hospital, Shenzhen, PR China, 518036.

<sup>†</sup> These authors contributed equally to this work.

\* Correspondence: liupeng\_polymer@126.com (P.L.); zenghui\_36@163.com (H.Z.)

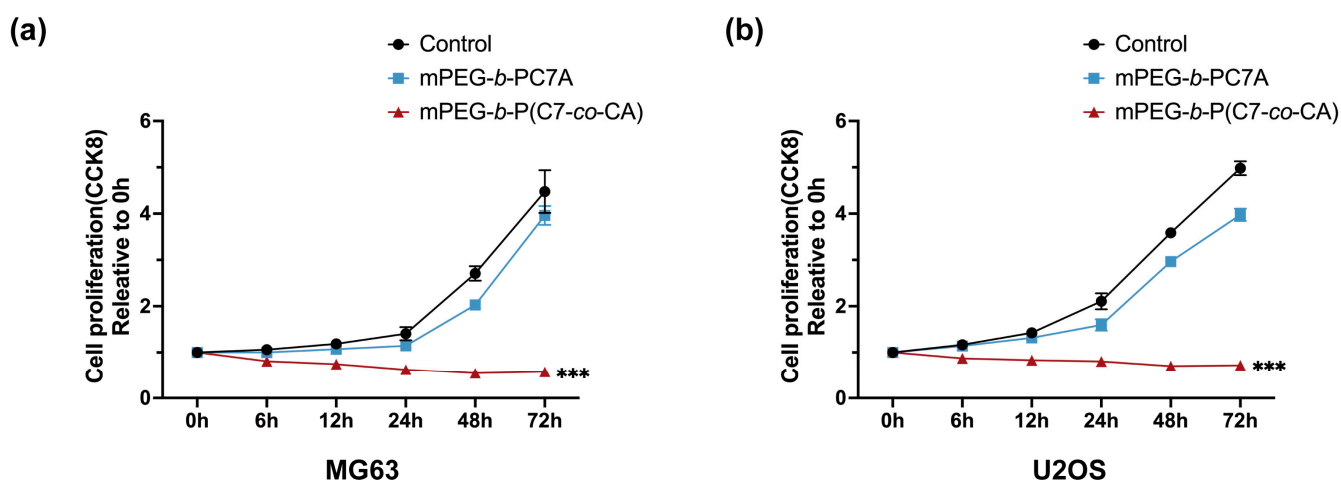

**Figure S1.** Effect of mPEG-b-P(C7-co-CA) micelles on the proliferation of MG63 cells (a) and U2OS cells (b) detected by CCK-8 assay (\*\* $P < 0.001$ , vs the control group).
